# Supplementary material for: Landscape-Level Variation in Disease Susceptibility Related to Shallow-Water Hypoxia
Source: PubMed Central journal article supplement (PMC4324988; doi:10.1371/journal.pone.0116223), 2015-02-11

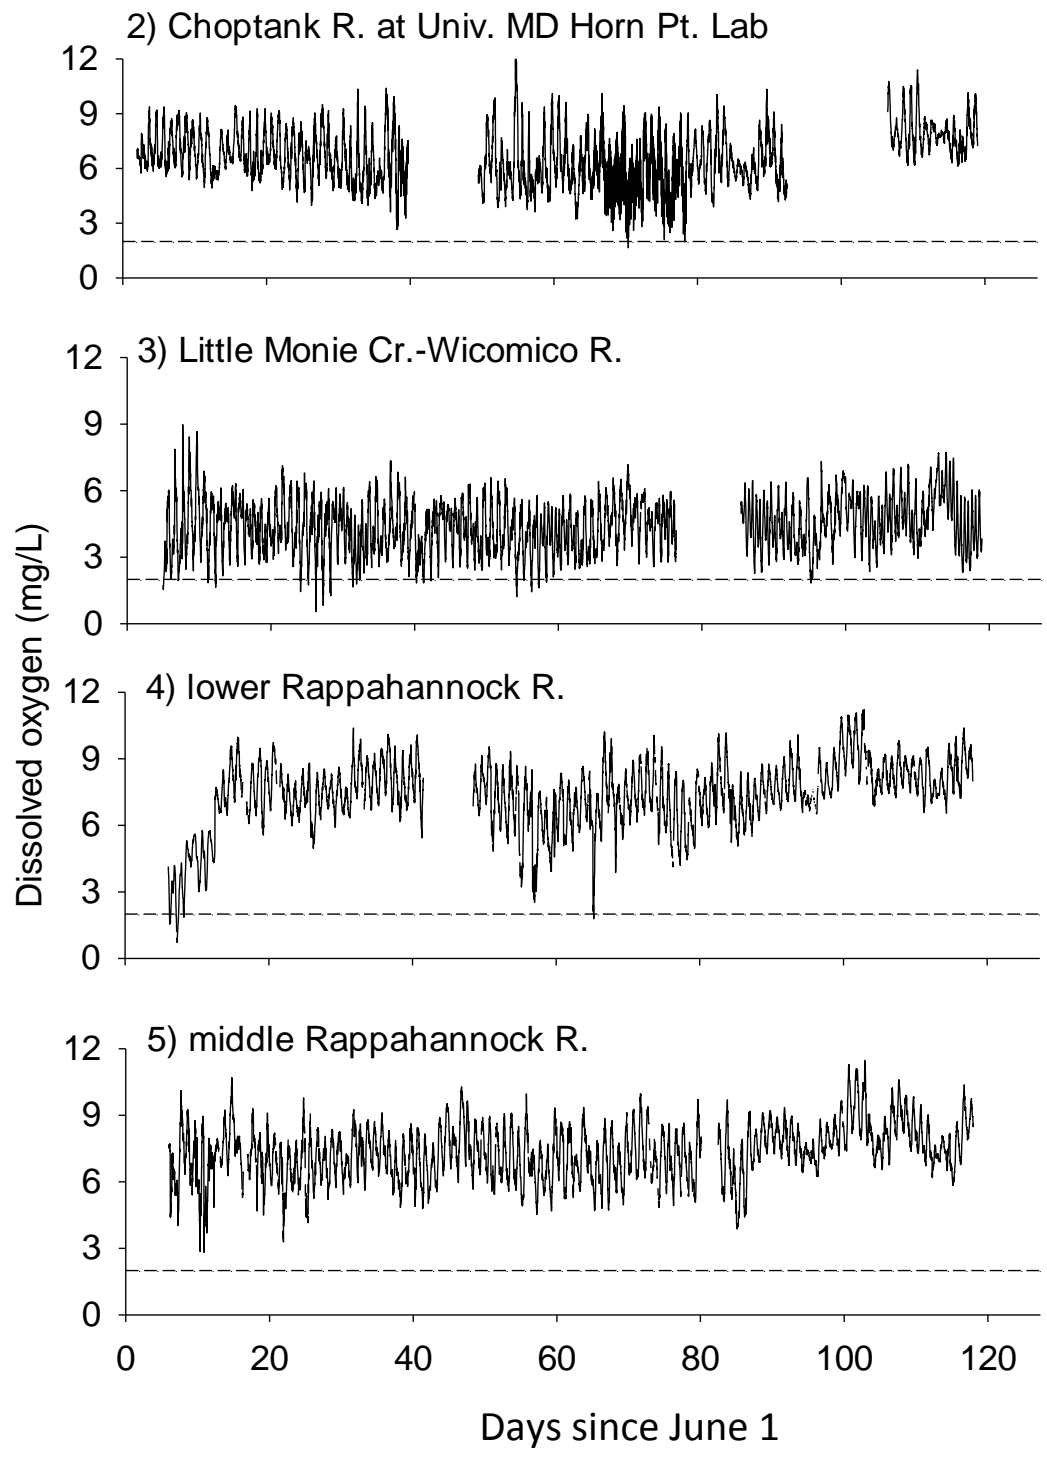

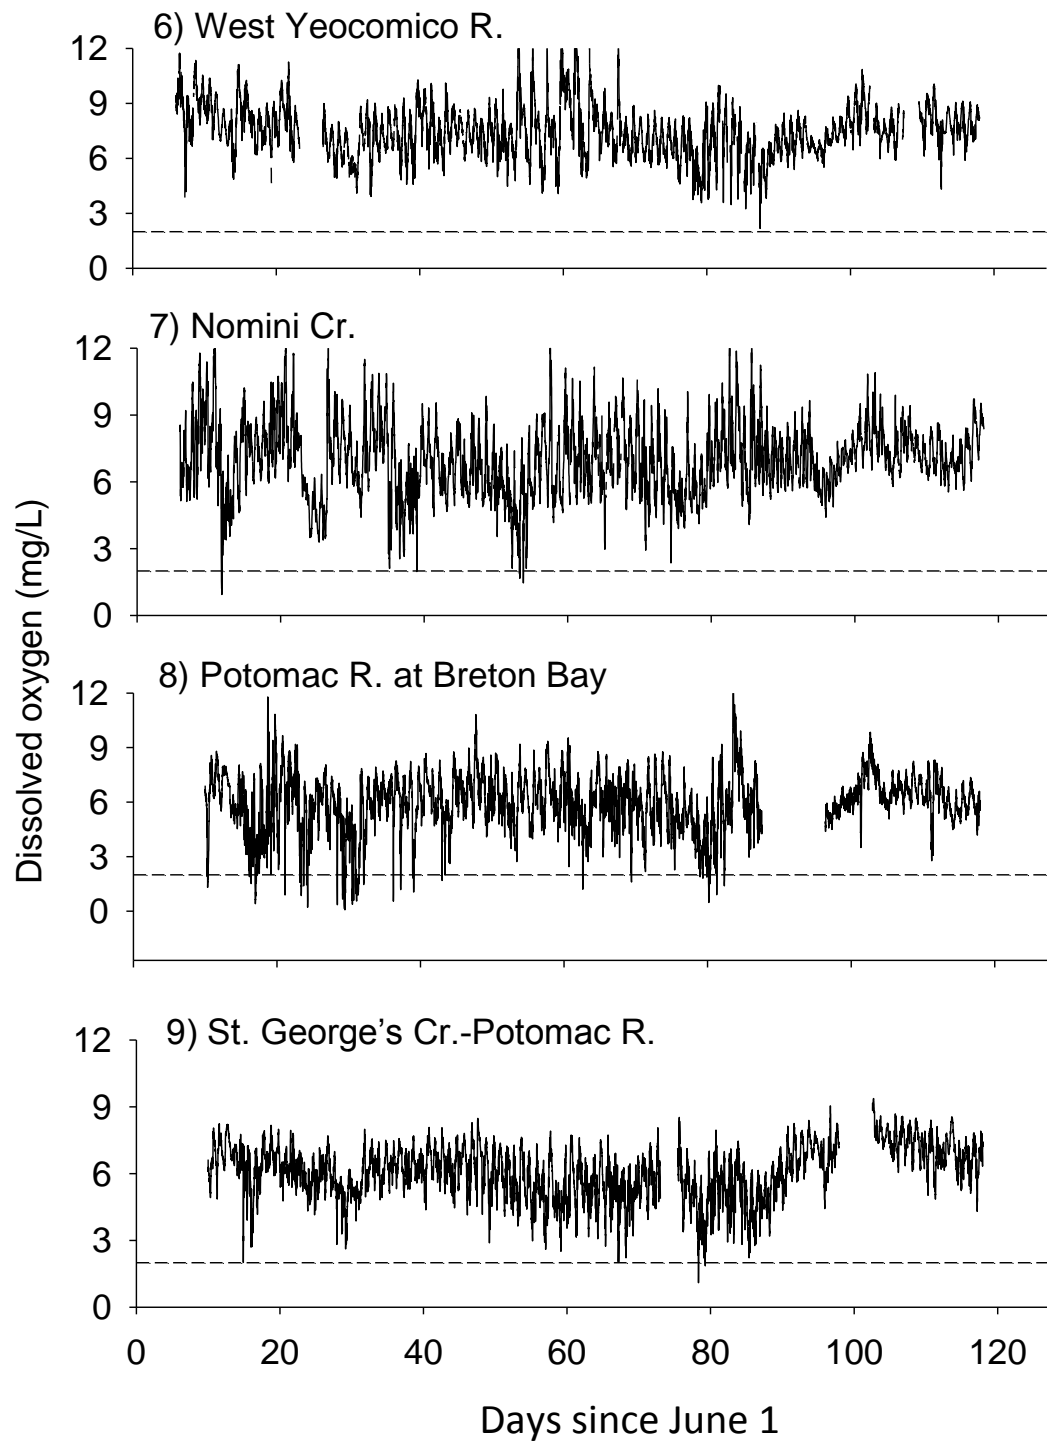

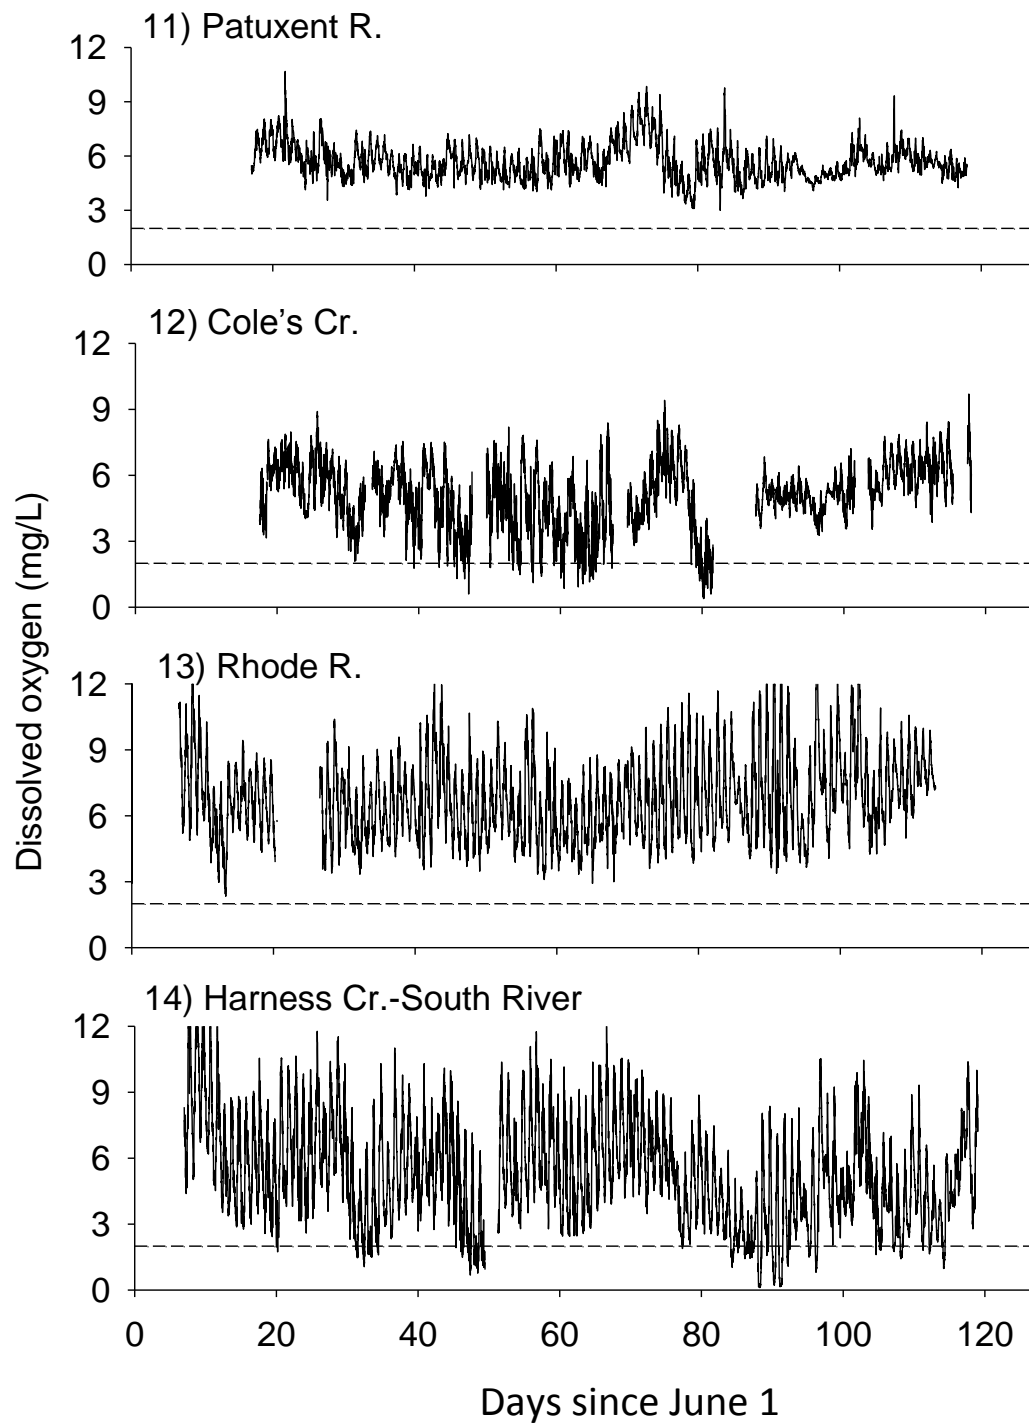

Supplement: pone.0116223.s001.pdf [file pone.0116223.s001.pdf]
