# Supplementary material for: Landscape-Level Variation in Disease Susceptibility Related to Shallow-Water Hypoxia
Source: PubMed Central journal article supplement (PMC4324988; doi:10.1371/journal.pone.0116223), 2015-02-11
Supplement: pone.0116223.s007.pdf [file pone.0116223.s007.pdf]

**Table S1.**

**Locations of experimental oyster deployments in 2008-09.** Numbers correspond to the site code in Figure 1 in the main manuscript and Fig. S1.

| Site   | Year    | Location description                                            |
|--------|---------|-----------------------------------------------------------------|
| Number | Sampled |                                                                 |
| 1      | 2008    | Choptank R. at Mulberry Pt. (38.7494° N, -76.2440° W)           |
| 2      | 2008    | Choptank R. at Univ. MD Horn Pt. Lab. (38.5935° N, -76.1288° W) |
| 3      | 2008    | Little Monie Cr.-Wicomico R. (38.2086° N, -75.8046° W)          |
| 4      | 2009    | lower Rappahannock R. (37.6209° N, -76.5467° W)                 |
| 5      | 2009    | middle Rappahannock R. (37.8220° N, -76.7503° W)                |
| 6      | 2009    | West Yeocomico R. (38.0290° N, -76.5519° W)                     |
| 7      | 2009    | Nomini Cr. (38.1319° N, -76.7176° W)                            |
| 8      | 2009    | Potomac R. at Breton Bay (38.2590° N, -76.6714° W)              |
| 9      | 2009    | St. George's Cr.-Potomac R. (38.1310° N, -76.49330° W)          |
| 10     | 2009    | St. Mary's R. (38.1894° N, -76.4338° W)                         |
| 11     | 2009    | Patuxent R. (38.3175° N, -76.4515° W)                           |
| 12     | 2009    | Cole's Cr. (38.3392° N, -76.4334° W)                            |
| 13     | 2008    | Rhode R. (38.8860° N, -76.5415° W)                              |
